# Supplementary material
Source: publisher site journal article supplement (https://www.dovepress.com/article/422545)
Supplement: Supplementary file 1 [file get_supplementary_file.php]

Table S1 Baseline characteristics of the patients with favorable and unfavorable clinical response on 14 days

|  | Favorable clinical  response group  (n = 24) | Unfavorable clinical  response group  (n = 19) | *P-*value |
| --- | --- | --- | --- |
| Demographic characteristics |  |  |  |
| Gender |  |  |  |
| Male (n, %) | 15 (62.5%) | 13 (68.4%) | 0.686 |
| Age (mean ± S.D.) | 56.46± 17.16 | 59.89± 15.11 | 0.496 |
| Age > 60 years (n, %) | 11 (45.8%) | 10 (52.6%) | 0.658 |
| BMI a | 23.26(21.32– 27.27) | 22.86 (22.03– 25.25) | 0.992 |
| Obese b (BMI ≥ 28 kg/m2) | 3 (12.5%) | 3 (15.8%) | 1.000 |
| Infection site variables (n, %) |  |  |  |
| Pulmonary infection | 23 (95.8%) | 15 (78.9%) | 0.216 |
| Bloodstream infection | 7 (29.2%) | 10 (52.6%) | 0.118 |
| Intra-abdominal infection | 5 (20.8%) | 5 (26.3%) | 0.953 |
| Urinary tract infections | 4 (16.7%) | 4 (21.1%) | 1.000 |
| Microbiology (n, %) |  |  |  |
| CR-GNB variables |  |  |  |
| Klebsiella pneumoniae | 8 (33.3%) | 7 (36.8%) | 0.811 |
| Pseudomonas aeruginosa | 2 (8.3%) | 0 (0.0%) | 0.495 |
| Enterobacter cloacae | 1 (4.2%) | 1 (5.3%) | 1.000 |
| Multiple CR-GNB infection | 12 (50.0%) | 12 (63.2%) | 0.388 |
| Concomitant with GPB infection | 9 (37.5%) | 7 (36.8%) | 0.965 |
| Severity variables |  |  |  |
| Length of hospitalization a (days) | 32.5(21.0– 63.8) | 52.0 (22.0– 69.0) | 0.276 |
| ICU duration a (days) | 22.5(13.5– 36.0) | 36.0 (18.0– 56.0) | 0.149 |
| Sepsis (n, %) | 4 (16.7%) | 7 (36.8%) | 0.249 |
| Septic shock (n, %) | 13 (54.2%) | 13 (68.4%) | 0.342 |
| APACHE II (mean ± S.D.) | 20.42 ± 2.57 | 22.95 ± 3.69 | 0.011* |
| Therapeutic interventions |  |  |  |
| CRRT (n, %) | 7 (29.2%) | 10 (52.6%) | 0.118 |
| Duration of Ventilator a (h) | 174.0(44.5– 587.3) | 514.0 (159.0– 960.0) | 0.101 |
| ECMO (n, %) | 0 (0.0%) | 4 (21.1%) | 0.067 |
| Treatment-related characteristic |  |  |  |
| The time to initiation of C-A a (days) | 4.5 (3.0– 6.8) | 7.0 (3.0– 15.0) | 0.154 |

a: Data are presented as median (interquartile range [IQR])

b: Obese was defined as patients BMI ≥ 28 kg/m^2

Abbreviations: BMI, Body mass index; GPB, Gram-positive bacteria; C-A, Ceftazidime-avibactam; APACHE, Acute Physiology and Chronic Health Evaluation CRRT, Continuous renal replacement therapy; ECMO, extracorporeal membrane oxygenation; IQR, Interquartile range.

* *P* < 0.05, there was statistically significant difference.
